inducible nitric oxide synthase in rat astroglial cultures: Role of protein kinase C. *J Neurochem* 2000; 74:613-20

25. Tschaikowsky K, Ritter J, Schroppe K, Kuhn M: Volatile anesthetics differentially affect immunostimulated expression of inducible nitric oxide synthase: Role of intracellular calcium. *ANESTHESIOLOGY* 2000; 92:1093-102

26. Park YC, Jun CD, Kang HS, Kim HD, Kim HM, Chung HT: Role of intracellular calcium as a priming signal for the induction of nitric oxide synthesis in murine peritoneal macrophages. *Immunology* 1996; 87:296-302

27. Jordan ML, Rominski B, Jaquins-Gerstl A, Geller D, Hoffman RA: Regulation of inducible nitric oxide production by intracellular calcium. *Surgery* 1995;118:138-45; discussion 145-6

28. Yamakage M, Hirshman CA, Croxton TL: Volatile anesthetics inhibit voltage-dependent  $Ca^{2+}$  channels in porcine tracheal smooth muscle cells. *Am J Physiol* 1995; 268:L187-91

29. Pajewski TN, Miao N, Lynch C, 3rd, Johns RA: Volatile anesthetics affect calcium mobilization in bovine endothelial cells. *ANESTHESIOLOGY* 1996; 85:1147-56

30. Bickler PE, Fahlman CS: The inhaled anesthetic, isoflurane, enhances  $Ca^{2+}$ -dependent survival signaling in cortical neurons and modulates MAP kinases, apoptosis proteins and transcription factors during hypoxia. *Anesth Analg* 2006; 103:419-29

31. Bickler PE, Zhan X, Fahlman CS: Isoflurane preconditions hippocampal neurons against oxygen-glucose deprivation: Role of intracellular  $Ca^{2+}$  and mitogen-activated protein kinase signaling. *ANESTHESIOLOGY* 2005; 103:532-9

32. Xu X, Feng J, Zuo Z: Isoflurane preconditioning reduces the rat NR8383 macrophage injury induced by lipopolysaccharide and interferon- $\gamma$ . *ANESTHESIOLOGY* 2008; 108:643-50

33. Wei H, Liang G, Yang H: Isoflurane preconditioning inhibited isoflurane-induced neurotoxicity. *Neurosci Lett* 2007; 425:59-62

## ■ ANESTHESIOLOGY REFLECTIONS

### The Lennox "Anaesthetic Wand"

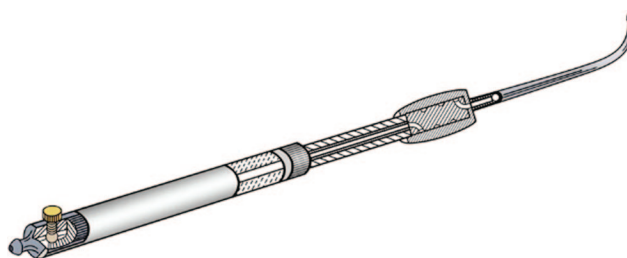

Several years after attending Philadelphia Dental College, Dr. Charles Parker Lennox (c.1833–1898) sided against two of his Union-sympathizing brothers by joining a Confederate regiment that their uncle had mustered in Kentucky. After deserting his commission as a Major in the Confederacy in 1864, Parker fled to Canada and eventually resumed the civilian practice of dentistry in Toronto. In 1891 Parker filed his U.S. Patent application for a "Dental Tool" (pictured above, courtesy of the Wood Library-Museum), which permitted nitrous oxide to pass through a hollow metal wand's proximal nipple, *via* a chloroform chamber, through a handle, and around a spiral-grooved warming chamber, before jetting out a distal aperture into a dental patient's mouth. Parker's strange "anaesthetic wand" likely worked as a combined inhalational and topical analgesic. (Copyright © the American Society of Anesthesiologists, Inc. This image appears in color in the *Anesthesiology Reflections* online collection available at [www.anesthesiology.org](http://www.anesthesiology.org).)

*George S. Bause, M.D., M.P.H., Honorary Curator, ASA's Wood Library-Museum of Anesthesiology, Park Ridge, Illinois, and Clinical Associate Professor, Case Western Reserve University, Cleveland, Ohio. [UJYC@aol.com](mailto:UJYC@aol.com).*
